# Supplementary material for: Vertical distribution of aerosols over the Maritime Continent during El Nino
Source: Copernicus journal article supplement (doi:10.5194/acp-2016-1179), 2017-02-16
Supplement: Supplementary file 1 [file acp-2016-1179-supplement.pdf]

# 1 Supplement:

## 2 Detailed Methodology

3 The buoyancy flux parameter ( $F_B$ ) **Equation A1** is a function of the temperature difference between the air  
4 ( $T_A$ ) and the fire ( $T_F$ ), the vertical motion of air ( $v$ ) and the size of the fire,  $d$  (here always measured at  $1\text{km}^2$  in  
5 this work).

$$6 \quad F_B = gv \frac{d^2}{4} \left( \frac{T_F - T_A}{T_A} \right) \quad (\text{A1})$$

7 The buoyancy flux parameter has been found empirically to demonstrate whether the plume rise is buoyancy or  
8 momentum dominated. Under stable atmospheric conditions [Stone and Carlson, 1979], where the atmospheric  
9 lapse rate is ( $L_A = \frac{\Delta T}{\Delta Z} < -5$ ), for a buoyancy dominated plume, (defined as where the difference between  $T_A$  and  
10  $T_F$  is given in **Equation A2b1**), the plume rise height ( $\Delta h$ ) is given by **Equation A2b2**, where ( $U$ ) is the  
11 horizontal wind magnitude.

$$12 \quad (T_F - T_A) > 0.01958 T_F \sqrt{v} \quad (\text{A2b1})$$

$$13 \quad \Delta h = 2.4 \left( \frac{F_B}{.02U} \right)^{1/3} \quad (\text{A2b2})$$

14 Whereas, for a momentum dominated plume (where the difference between  $T_A$  and  $T_F$  is less than the right hand  
15 side of **Equation A2b1**), the height rise is given by **Equation A2b3**.

$$16 \quad \Delta h = 1.5 \left( \frac{v^2 d^2 T_A}{4 T_F \sqrt{.02U}} \right)^{1/3} \quad (\text{A2b3})$$

17 On the other hand, under unstable atmospheric conditions (where  $L_A > -5$ ), and where the plume rise is  
18 buoyancy dominated, the plume rise height is given by either **Equation A2b4** when  $F_B > 55$  or **Equations**  
19 **A2b5, A2b6** when  $F_B < 55$  [Woodward, 2010].

$$20 \quad X^* = 14 F_B^{\frac{5}{8}} \quad (\text{A2b4})$$

$$21 \quad X^* = 34 F_B^{\frac{2}{5}} \quad (\text{A2b5})$$

$$22 \quad \Delta h = 1.6 \frac{F_B^{\frac{1}{3}} (3.5 X^*)^{\frac{2}{3}}}{U} \quad (\text{A2b6})$$
